# Supplementary material
Source: PubMed Central journal article supplement (PMC4849814)
Supplement: ASN.2014121271_ASN2014121271SupplementaryData.pdf [file ASN.2014121271_ASN2014121271SupplementaryData.pdf]

## Supplementary Table 1:

| Demographic and Clinical Characteristics of Diabetic Patients |                        |                                  |                          |                         |
|---------------------------------------------------------------|------------------------|----------------------------------|--------------------------|-------------------------|
| Variable                                                      | Normal                 | Slow Progression<br><0.6cc/min/m | Fast<br>>0.6cc/min/m     | CKD5                    |
|                                                               | N=12                   | N=13                             | N=13                     | N=8                     |
| Male sex - no (%)                                             | 7(58)                  | 5(38)                            | 6(46)                    | 3(37)                   |
| Age (years)                                                   | 50.3±21.0 <sup>b</sup> | 63.0±10.9 <sup>b</sup>           | 55.2±13.4 <sup>b,d</sup> | 57.8±8 <sup>b</sup>     |
| HTN                                                           | 6(50)                  | 13(100) <sup>a</sup>             | 13(100) <sup>a</sup>     | 8(100) <sup>a</sup>     |
| DM                                                            | 3(25)                  | 13(100) <sup>b</sup>             | 13(100) <sup>b</sup>     | 8(100) <sup>b</sup>     |
| ACE inhibitor or ARB                                          | 1(12.5)                | 9(69) <sup>b</sup>               | 10(76) <sup>b</sup>      | 5(100) <sup>b</sup>     |
| Statin                                                        | 4(33)                  | 8(61) <sup>b</sup>               | 8(61) <sup>b</sup>       | 3(60)                   |
| Fibrate                                                       | 0(0)                   | 0(0)                             | 0(0)                     | 0(0)                    |
| BP on admision                                                | 126/75±26/12           | 151/81±16/10                     | 151/86±24/13             | 161/81±8/8              |
| Serum creatinine - mg/dl                                      | 0.9±0.3                | 1.5±0.5 <sup>a,h</sup>           | 2.1±1.3 <sup>a,h</sup>   | 5.2±1.1 <sup>a</sup>    |
| Serum urea — mg/dl                                            | 39.2±14.7              | 73.3±20.3 <sup>a,h</sup>         | 85.6±44 <sup>a,h</sup>   | 169±57.9 <sup>a,f</sup> |
| Estimated GFR-ml/min/1.73m <sup>2</sup>                       | 97.4±29.5              | 46.8±20.3 <sup>a,f</sup>         | 51.4±36.1 <sup>a,f</sup> | 10.4±3.2 <sup>b,f</sup> |
| Glycated hemoglobin %                                         |                        | 7.4±1.3                          | 9.0±2.5                  | 9.7±3.7                 |
| Plasma LDL-c mg/dl                                            | 115.2±27.2             | 106.2±44.1                       | 131.7±89.6               | 133.3±35.1              |
| plasma-HDL-c mg/dl                                            | 51.7±17.1              | 49.8±12.0                        | 52.6±18.8                | 40.1±14.9               |
| plasma-TG mg/dl                                               | 154.0±66.4             | 355.8±449.4                      | 243.7±215.9              | 161.0±31.3              |
| Serum albumin - mg/dl                                         | 4.1±0.5                | 3.4±0.7 <sup>a</sup>             | 3.2±0.5 <sup>a</sup>     | 3.5±0.3 <sup>a</sup>    |
| Proteinuria mg/day (median)                                   | 0                      | 3000 <sup>a</sup>                | 6543 <sup>a</sup>        | 2900 <sup>a</sup>       |
| weight kg                                                     | 62.2±17.5              | 97.5±23.6                        | 78.7±27.9                | 83±15.1                 |
| <b>Histology</b>                                              |                        |                                  |                          |                         |
| glomeruli number                                              | 29.4±8.9               | 17.4±9.6 <sup>a</sup>            | 24.1±9.0                 | 34.8±35.6               |
| Globally sclerotic glomeruli(%)                               | 1.9±3.0                | 23.8±20.4 <sup>a</sup>           | 35.9±28.7 <sup>a</sup>   | 49±35.6 <sup>a</sup>    |
| Segmentally sclerotic glomeruli(%)                            | 0.0                    | 11.3±13.0 <sup>b</sup>           | 24.1±24.9 <sup>b</sup>   | 21.6±15.8 <sup>b</sup>  |
| Increased mesangial matrix                                    | 0.3±0.4                | 1.6±0.8                          | 2.1±0.7 <sup>b</sup>     | 2.2±0.8 <sup>b</sup>    |
| Bowman's capsule thickening                                   | 0                      | 1.9±0.4 <sup>b</sup>             | 1.7±0.5 <sup>b</sup>     | 2±0 <sup>b</sup>        |
| Tubular atrophy (%)                                           | 0                      | 1.4±0.5 <sup>b</sup>             | 1.7±0.5 <sup>b</sup>     | 2.2±0.8 <sup>b</sup>    |
| Interstitial fibrosis (%)                                     | 0                      | 1.2±0.6 <sup>b,f</sup>           | 1.5±0.5 <sup>b,f</sup>   | 2.1±0.6 <sup>b</sup>    |
| Vascular sclerosis                                            | 0.1±0.35               | 1.5±0.8 <sup>e,f</sup>           | 2.8±0.4 <sup>b,d,f</sup> | 2.6±0.4 <sup>b,d</sup>  |
| interstitial inflammation                                     | 0                      | 1.0±0.5 <sup>b</sup>             | 1.8±0.9 <sup>b,d</sup>   | 1.6±1.1 <sup>b,d</sup>  |

Data are means ± SD or n (%). eGFR was calculated using the Modification of Diet in Renal Disease formula. Student t test was used to determine the statistical significance between groupse .

The degree of sclerosis, thickening, and fibrosis were evaluated on the basis of an arbitrary scale (0 = normal = 0%, 1 = mild =,20%, 2 = moderate =20–40%, and 3 = severe = .40%) and was taken from routine pathological evaluations

Vascular sclerosis: 0 = normal; 1 = mild; 2 = moderate; and 3 = severe. a P < 0.05 vs Normal

Lumen cells and lumen thrombi: 0 = normal and 1 = increased. b P < 0.001 vs Normal

Mesangial matrix: 0 = normal; 1 = focal; 2 = increased, mild; and 3 = increased,nodular. d P < 0.01 vs Slow vs fast

Bowman's capsule thickening: 0 = normal; 1 = focal; 2 = circumferential e P < 0.05 vs CKD5

Interstitial fibrosis 0-no inflamation 1-mild 2-severe. f P < 0.05 vs CKD5

interstitial inflammation 0-no inflammation 1-mild 2-severe. h P < 0.001 vs CKD5

**Supplementary Table 2: Primer Sequences used for RT-QPCR**

|                | Forward primer sequences        | Reverse primer sequences        |
|----------------|---------------------------------|---------------------------------|
| mTGR5          | 5'-TGCTTCTTCCTAAGCCTACTACT      | 5'-CTGATGGTTCCGGCTCCATAG        |
| mSIRT1         | 5'-TGATTGGCACCGATCCTCG          | 5'-CCACAGCGTCATATCATCCAG        |
| mSIRT3         | 5'-GAGCGGCCTCTACAGCAAC          | 5'-<br>GGAAGTAGTGAGTGACATTGGG   |
| mERR $\alpha$  | 5'-CAGGGAGGGAAGGGATGG           | 5'-TGAGGAGAGGAGCGAAGG           |
| mNrf-1         | 5'-<br>AGTATGCTAAGTGCTGATGAAGAC | 5'-GCTGCCGTGGAGTTGAGG           |
| mNrf-2         | 5'-CTTTAGTCAGCGACAGAAGGAC       | 5'-<br>AGGCATCTTGTTTGGGAATGTG   |
| mDGAT1         | 5'-<br>CTGATCCTGAGTAATGCAAGGTT  | 5'-<br>TGGATGCAATAATCACGCATGG   |
| mPPAR $\alpha$ | 5'-TCGCTATCCAGGCAGAAGG          | 5'-<br>AACAACAACAATAACCCACAGACC |
| mUCP2          | 5'-CAGCGCCAGATGAGCTTTG          | 5'-GGAAGCGGACCTTTACCACA         |
| mCPT1b         | 5'-TGTTAGAGAACGATAAGG           | 5'-CGCATTATTCAAGAAGAG           |
| hSOD2          | 5'-CTGGAACCTCACATCAAC           | 5'-GTACTTCTCCTCGGTGAC           |
| hLCAD          | 5'-AAGTGATGTTGTGATTGTAGTTG      | 5'-GAATAGTTCTGCGGTATCCTG        |
| hCPT1b         | 5'-ATCTTCTTCTTCCGCCAAA          | 5'-GGTCAAGTTGCTGGTCTT           |
| hPPAR $\alpha$ | 5'-CAGATGCCACCAGGAGAAC          | 5'-TGAGGAGACCACAGGAACC          |
